# Supplementary material for: Reference miRNAs for miRNAome Analysis of Urothelial Carcinomas
Source: PubMed Central journal article supplement (PMC3380005; doi:10.1371/journal.pone.0039309), 2012-06-20
Supplement: pone.0039309.s001.pdf [file pone.0039309.s001.pdf]

**Table S1 Description of the experimental details of the RT-qPCR analyses according to the checklist of the MIQE guidelines.**

The items in the checklist summarize the characteristics of the RT-qPCR analyses according to Bustin et al. [Clin Chem (2009) 611-622] and indicate where the details are described in the manuscript.

| ITEM TO CHECK                                                   | IMPOR-TANCE <sup>&amp;</sup> | CHECK-LIST | WHERE IN THE MANUSCRIPT; ADDITIONAL COMMENT                                                                                                                                                            |
|-----------------------------------------------------------------|------------------------------|------------|--------------------------------------------------------------------------------------------------------------------------------------------------------------------------------------------------------|
| <b>EXPERIMENTAL DESIGN</b>                                      |                              |            |                                                                                                                                                                                                        |
| Definition of experimental and control groups                   | E                            | Yes        | Materials and Methods: Patients and tissue samples.                                                                                                                                                    |
| Number within each group                                        | E                            | Yes        | Materials and methods: Patients and tissue samples.                                                                                                                                                    |
| Assay carried out by core lab or investigator's lab?            | D                            | Yes        | All assays were performed in investigator's lab.                                                                                                                                                       |
| Acknowledgement of authors' contributions                       | D                            | Yes        | Contributors who do not meet the authorship as defined by the journal are listed in the Acknowledgement section.                                                                                       |
| <b>SAMPLE</b>                                                   |                              |            |                                                                                                                                                                                                        |
| Description                                                     | E                            | Yes        | Materials and Methods.                                                                                                                                                                                 |
| Volume/mass of sample processed                                 | D                            | Yes        | Materials and Methods: Isolation of RNA....                                                                                                                                                            |
| Microdissection or macrodissection                              | E                            | Yes        | Materials and Methods: Isolation of RNA....; macrodissections with histological verification.                                                                                                          |
| Processing procedure                                            | E                            | Yes        | Materials and Methods: Patients and tissue samples; Isolation of RNA...                                                                                                                                |
| If frozen – how and how quickly?                                | E                            | Yes        | Materials and Methods: Patients and tissue samples.                                                                                                                                                    |
| If fixed – with what, how quickly?                              | E                            | N/A        | -                                                                                                                                                                                                      |
| Samples storage conditions and duration (esp. for FFPE samples) | E                            | Yes        | Materials and Methods: Patients and tissue samples.                                                                                                                                                    |
| <b>NUCLEIC ACID EXTRACTION</b>                                  |                              |            |                                                                                                                                                                                                        |
| Procedure and/or instrumentation                                | E                            | Yes        | Materials and Methods: Isolation of RNA and characterization of quantity and quality; references are indicated.                                                                                        |
| Name of kit and details of any modifications                    | E                            | Yes        | Materials and Methods: Isolation of RNA and characterization of quantity and quality; references are indicated.                                                                                        |
| Source of additional reagents used                              | E                            | Yes        | RNase-free DNase set; Qiagen (cat.no. 79254); see subsequent information.                                                                                                                              |
| Details of DNase or RNase treatment                             | E                            | Yes        | Materials and Methods: Isolation of RNA....; an optional on column digestion DNase step was used.                                                                                                      |
| Contamination assessment (DNA or RNA)                           | E                            | Yes        | See previous comment; according to Chen et al. (Nucleic Acids Res 33(2005) e179) miRNA measurements by the TaqMan assays are not affected by genomic DNA; see also comment on Cqs with and without RT. |
| Nucleic acid quantification                                     | E                            | Yes        | Materials and Methods: Isolation of RNA and characterization of quantity and quality; references are indicated.                                                                                        |
| Instrument and method                                           | E                            | Yes        | Materials and Methods: Isolation of RNA and characterization of quantity and quality; references are indicated.                                                                                        |
| Purity (A260/A280)                                              | D                            | Yes        | Materials and Methods: Isolation of RNA and characterization of quantity and quality; references are indicated.                                                                                        |
| Yield                                                           | D                            | Yes        | Materials and Methods: Isolation of RNA and characterization of quantity and quality.                                                                                                                  |
| RNA integrity method/instrument                                 | E                            | Yes        | Materials and Methods: Isolation of RNA and characterization of quantity and quality; Bioanalyzer 2100 (Agilent).                                                                                      |
| RIN/RQI or Cq of 3' and 5' transcripts                          | E                            | Yes        | RIN values; given in Materials and Methods: Isolation of RNA and characterization of quantity and quality.                                                                                             |
| Electrophoresis traces                                          | D                            | No         | -                                                                                                                                                                                                      |
| Inhibition testing (Cq dilutions, spike or other)               | E                            | Yes        | Dilution experiments were performed; PCR efficiencies were found 81%-88%; see also Supporting Information, Methods S1. For all clinical samples, identical isolation procedures were performed.        |
| <b>REVERSE TRANSCRIPTION</b>                                    |                              |            |                                                                                                                                                                                                        |
| Complete reaction condition                                     | E                            | Yes        | Materials and Methods: Quantitative real-time PCR; references are indicated.                                                                                                                           |
| Amount of RNA and reaction volume                               | E                            | Yes        | Materials and Methods: Quantitative real-time PCR; references are indicated.                                                                                                                           |

| ITEM TO CHECK                                             | IMPOR-<br>TANCE <sup>&amp;</sup> | CHECK-<br>LIST | WHERE IN THE MANUSCRIPT;<br>ADDITIONAL COMMENT                                                                              |
|-----------------------------------------------------------|----------------------------------|----------------|-----------------------------------------------------------------------------------------------------------------------------|
| Priming oligonucleotide (if using GSP) and concentration  | E                                | Yes            | Materials and Methods: Quantitative real-time PCR; references are indicated.                                                |
| Reverse transcriptase and concentration                   | E                                | Yes            | Materials and Methods: Quantitative real-time PCR; references are indicated.                                                |
| Temperature and time                                      | E                                | Yes            | Materials and Methods: Quantitative real-time PCR; references are indicated.                                                |
| Manufacturer and reagents and catalogue numbers           | D                                | Yes            | Materials and Methods: Quantitative real-time PCR; references are indicated.; see also Supporting Information, Table S2.    |
| Cqs with and without RT                                   | D*                               | Yes            | There were no Cqs < 40 in reactions without RT.                                                                             |
| Storage conditions of cDNA                                | D                                | Yes            | Materials and Methods: Quantitative real-time PCR; - 20°C.                                                                  |
| <b>qPCR TARGET INFORMATION</b>                            |                                  |                |                                                                                                                             |
| If multiplex, efficiency and LOD of each assay            | E                                | N/A            | -                                                                                                                           |
| Sequence accession number                                 | E                                | Yes            | Table 1 and Supporting Information, Table S2.                                                                               |
| Location of amplicon                                      | D                                | Yes            | Use of miRNAs specific TaqMan assays; specificity guaranteed by the manufacturer.                                           |
| Amplicon length                                           | E                                | N/A            | Use of miRNAs specific TaqMan assays; specificity guaranteed by the manufacturer.                                           |
| <i>In silico</i> specificity screen (BLAST, etc.)         | E                                | N/A            | Use of miRNA specific TaqMan assays; specificity guaranteed by the manufacturer.                                            |
| Pseudogenes, retropseudogenes or other homologs?          | D                                | N/A            | Use of miRNA specific TaqMan assays; specificity guaranteed by the manufacturer.                                            |
| Sequence alignment                                        | D                                | N/A            | Use of miRNA specific TaqMan assays; specificity guaranteed by the manufacturer.                                            |
| Secondary structure analysis of amplicon                  | D                                | N/A            | Use of miRNA specific TaqMan assays; specificity guaranteed by the manufacturer.                                            |
| Location of each primer by exon or intron (if applicable) | E                                | Yes            | Use of miRNA specific TaqMan assays; specificity guaranteed by the manufacturer.                                            |
| What splice variants are targeted?                        | E                                | Yes            | Specificity guaranteed by manufacturer of the TaqMan assays.                                                                |
| <b>qPCR OLIGONUCLEOTIDES</b>                              |                                  |                |                                                                                                                             |
| Primer sequences                                          | E                                | N/A            | The manufacturer does not provide this information for miRNAs; see also Supporting Information, Table S2.                   |
| RTPrimerDB Identification Number                          | D                                | N/A            | Use of miRNA specific TaqMan assays; see also Supporting Information, Table S2.                                             |
| Probe sequences                                           | D**                              | N/A            | The manufacturer does not provide this information for miRNAs; see also Supporting Information, Table S2.                   |
| Location and identity of any modifications                | E                                | Yes            | The manufacturer does not provide this information for miRNAs; see also Supporting Information, Table S2.                   |
| Manufacture of oligonucleotides                           | D                                | Yes            | Applied Biosystems as part of Life Technologies.                                                                            |
| Purification method                                       | D                                | No             | Applied Biosystems does not provide information.                                                                            |
| <b>qPCR PROTOCOL</b>                                      |                                  |                |                                                                                                                             |
| Complete reaction conditions                              | E                                | Yes            | Materials and Methods: Quantitative real-time PCR; references are indicated; use of miRNA specific TaqMan assays.           |
| Reaction volume and amount of cDNA/DNA                    | E                                | Yes            | Materials and Methods: Quantitative real-time PCR; references are indicated.                                                |
| Primer, (probe), Mg <sup>++</sup> and dNTP concentration  | E                                | Yes            | Materials and Methods: Quantitative real-time PCR; references are indicated; use of miRNA specific TaqMan assays.           |
| Polymerase identity and concentration                     | E                                | Yes            | Materials and Methods: Quantitative real-time PCR; references are indicated; use of miRNA specific TaqMan assays.           |
| Buffer/kit identity and manufacture                       | E                                | No             | Materials and Methods: Quantitative real-time PCR; references are indicated; use of miRNA specific TaqMan assays.           |
| Exact chemical constitution of the buffer                 | D                                | Yes            | The manufacturer does not provide this information.                                                                         |
| Additives (SYBR Green I, DMSO, ect.)                      | E                                | Yes            | Use of TaqMan assays without additional additives.                                                                          |
| Manufacturer of plates/tubes and catalog number           | D                                | Yes            | Materials and Methods: Quantitative real-time PCR; white 96-well PCR plates (Roche; cat.no. 04729692001 with sealing foils) |
| Complete thermocyclingparameter                           | E                                | Yes            | Materials and Methods: Quantitative real-time PCR.                                                                          |
| Reaction setup (manual/robotic)                           | D                                | Yes            | Manual setup.                                                                                                               |
| Manufacturer of qPCR instruments                          | E                                | Yes            | LightCycler 480; see also Materials and Methods: Quantitative real-time PCR.                                                |
| <b>qPCR VALIDATION</b>                                    |                                  |                |                                                                                                                             |
| Evidence of optimisation (from gradients)                 | D                                | Yes            | Kits from Applied Biosystems; optimization guaranteed by the manufacturer.                                                  |
| Specificity (gel, sequence, melt, or digest)              | E                                | Yes            | Specificity guaranteed by manufacturer of the TaqMan assays.                                                                |

| ITEM TO CHECK                                                                     | IMPOR-<br>TANCE <sup>&amp;</sup> | CHECK-<br>LIST | WHERE IN THE MANUSCRIPT;<br>ADDITIONAL COMMENT                                                                                                                                                              |
|-----------------------------------------------------------------------------------|----------------------------------|----------------|-------------------------------------------------------------------------------------------------------------------------------------------------------------------------------------------------------------|
| For SYBR Green I, Cq of the NTC                                                   | E                                | Not applicable | -                                                                                                                                                                                                           |
| Calibration curves with slope and Y-intercept                                     | E                                | Yes            | Material and Methods: Quantitative real-time PCR; see also Supporting Information, Methods S1.                                                                                                              |
| PCR efficiency calculated from slope                                              | E                                | Yes            | Material and Methods: Quantitative real-time PCR; see also Supporting Information, Methods S1.                                                                                                              |
| Confidence interval PCR efficiency or standard error                              | D                                | Yes            | Supporting Information, Methods S1.                                                                                                                                                                         |
| r <sup>2</sup> of standard curve                                                  | E                                | No             | Not provided by the LightCycler 480 software.                                                                                                                                                               |
| Linear dynamic range                                                              | E                                | Yes            | Material and Methods: Quantitative real-time PCR; see also Supporting Information, Methods S1.                                                                                                              |
| Cq variation at lowest concentration of the linear interval of calibration curves | E                                | Yes            | Supporting Information, Methods S1.                                                                                                                                                                         |
| Confidence intervals throughout range                                             | D                                | No             | -                                                                                                                                                                                                           |
| Evidence for limit of detection                                                   | E                                | Yes            | Material and Methods: Quantitative real-time PCR; see also Supporting Information, Methods S1.<br>Measurements of all miRNAs were in linear dynamic range. Thus, it was not necessary to determine the LOD. |
| If multiplex, efficiency and LOD of each assay                                    | E                                | N/A            | -                                                                                                                                                                                                           |
| <b>DATA ANALYSIS</b>                                                              |                                  |                |                                                                                                                                                                                                             |
| qPCR analysis program (source, version)                                           | E                                | Yes            | Materials and Methods: Quantitative real-time PCR and Supporting Information, Methods S1.                                                                                                                   |
| Cq method determination                                                           | E                                | Yes            | Cq >35 was decided as limit.                                                                                                                                                                                |
| Outlier identification and disposition                                            | E                                | Yes            | There were no outliers.                                                                                                                                                                                     |
| Results of NTCs                                                                   | E                                | Yes            | NTC did not result in any amplification; Cq >40.                                                                                                                                                            |
| Justification of number and choice of reference genes                             | E                                | Yes            | See Results/Discussion.                                                                                                                                                                                     |
| Description of normalization method                                               | E                                | Yes            | Materials and Methods: Data analysis, use of geNorm, NormFinder, BestKeeper.                                                                                                                                |
| Number and concordance of biological replicates                                   | D                                | Yes            | Figure 1 and 3: nonmalignant n = 17; low-grade tumor samples n = 20; high-grade tumor samples n = 21.                                                                                                       |
| Number and stage (RT or qPCR) of technical replicates                             | E                                | Yes            | Materials and Methods: Quantitative real-time PCR; triplicate measurements.                                                                                                                                 |
| Repeatability (intra-assay variation, %CV)                                        | E                                | Yes            | Materials and Methods: Quantitative real-time PCR                                                                                                                                                           |
| Reproducibility (inter-assay variation, %CV)                                      | D                                | Yes            | Materials and Methods: Quantitative real-time PCR; in addition; biological replicates were preferred in favor of technical replicates.                                                                      |
| Power analysis                                                                    | D                                | No             | -                                                                                                                                                                                                           |
| Statistical methods for result significance                                       | E                                | Yes            | Materials and Methods: Data analysis; Results and Figure legends.                                                                                                                                           |
| Software (source, version)                                                        | E                                | Yes            | Materials and Methods: Data analysis.                                                                                                                                                                       |
| Cq or raw data submission RDML                                                    | D                                | No             | -                                                                                                                                                                                                           |

<sup>&</sup>E, essential information that must be submitted with the manuscript; D, desirable information that should be submitted with the manuscript if available.
