# Supplementary material for: Reference miRNAs for miRNAome Analysis of Urothelial Carcinomas
Source: PubMed Central journal article supplement (PMC3380005; doi:10.1371/journal.pone.0039309), 2012-06-20
Supplement: pone.0039309.s002.pdf [file pone.0039309.s002.pdf]

**Table S2 TaqMan assays for microRNAs and small nuclear and nucleolar RNAs.**

TaqMan assays from Applied Biosystems for the examined mature miRNAs and small nuclear RNAs are listed. The assay name, assay ID, miRBase accession number, miRBase ID, and the sequence are given for the miRNAs and correspondingly for the small nuclear and nucleolar RNAs. miRNAs were identified by the permanently assigned miRBase accession number, the miRBase-prescribed ID related to the miRBase version, and the sequence.

| Assay name      | Assay ID | miRBase accession no. | miRBase ID <sup>&amp;</sup>                      | Sequence                 |
|-----------------|----------|-----------------------|--------------------------------------------------|--------------------------|
| hsa-miR-15a     | 000389   | MIMAT0000068          | hsa-miR-15a (v10.1)<br>hsa-miR-15a-5p (v18)      | UAGCAGCACAUA AUGGUUUGUG  |
| hsa-miR-20b     | 000580   | MIMAT0001413          | hsa-miR-20b (v10.1)<br>hsa-miR-20b-5p (v18)      | CAAAGUGCUC AUAGUGCAGGUAG |
| hsa-miR-29c     | 000587   | MIMAT0000681          | hsa-miR-29c (v10.1)<br>hsa-miR-29c-3p(v18)       | UAGCACCAUUUGAAAUCGGUUA   |
| hsa-miR-101     | 002253   | MIMAT0000099          | hsa-miR-101 (v10.1)<br>hsa-miR-101-3p (v18)      | UACAGUACUGUGAU AACUGAA   |
| hsa-miR-107     | 000443   | MIMAT0000104          | hsa-miR-107 (v10.1)<br>hsa-miR-107 (v18)         | AGCAGCAUUGUACAGGGCUAUCA  |
| hsa-miR-125a-5p | 002198   | MIMAT0000443          | hsa-miR-125a-5p (v10.1)<br>hsa-miR-125a-5p (v18) | UCCCUGAGACCCUUA ACCUGUGA |
| hsa-miR-148b    | 000417   | MIMAT0000759          | hsa-miR-148b (v10.1)<br>hsa-miR-148b-3p (v18)    | UCAGUGCAUCACAGAACUUUGU   |
| hsa-miR-151-3p  | 002254   | MIMAT0000757          | hsa-miR-151-3p (v10.1)<br>hsa-miR-151-3p (v18)   | CUAGACUGAAGCUCCUUGAGG    |
| hsa-miR-151-5p  | 002642   | MIMAT0004697          | hsa-miR-151-5p (v10.1)<br>hsa-miR-151-5p (v18)   | UCGAGGAGCUCACAGUCUAGU    |
| hsa-miR-181a    | 000480   | MIMAT0000256          | hsa-miR-181a (v10.1)<br>hsa-miR-181a-5p (v18)    | AACAUUCAACGCUGUCGGUGAGU  |
| hsa-miR-181b    | 001098   | MIMAT0000257          | hsa-miR-181b (v10.1)<br>hsa-miR-181b-5p (v18)    | AACAUUCAUUGCUGUCGGUGGGU  |
| hsa-miR-324-3p  | 002161   | MIMAT0000762          | hsa-miR-324-3p (v10.1)<br>hsa-miR-324-3p (v18)   | ACUGCCCCAGGUGCUGCUGG     |

| Assay name      | Assay ID | miRBase accession no. | miRBase ID <sup>&amp;</sup>                      | Sequence                 |
|-----------------|----------|-----------------------|--------------------------------------------------|--------------------------|
| hsa-miR-424     | 000604   | MIMAT0001341          | hsa-miR-424 (v10.1)<br>hsa-miR-424-5p (v18)      | CAGCAGCAAUUCAUGUUUUGAA   |
| hsa-miR-513a-5p | 002090   | MIMAT0002877          | hsa-miR-513a-5p (v10.1)<br>hsa-miR-513a-5p (v18) | UUCACAGGGAGGUGUCAU       |
| hsa-miR-874     | 002268   | MIMAT0004911          | hsa-miR-874 (v10.1)<br>hsa-miR-874 (v18)         | CUGCCCUGGCCCGAGGGACCGA   |
| hsa-miR-939     | 002182   | MIMAT0004982          | hsa-miR-939 (v10.1)<br>hsa-miR-939 (v18)         | UGGGGAGCUGAGGCUCUGGGGGUG |

<sup>&</sup>miRNA ID in the miRBase version 10.1 and 18, respectively.

| Gene name | Assay ID | Assay name | Sequence                                                            |
|-----------|----------|------------|---------------------------------------------------------------------|
| RNU6B     | 001093   | 568915     | CGCAAGGATGACACGCAAATTCGTGAAGCGTTCATATTTTT                           |
| RNU48     | 001006   | 568908     | GATGACCCCAGGTAACCTCTGAGTGTGTCGCTGATGCCATCACCGCAGCGCTCTGACC          |
| Z30       | 001092   | 568917     | TGGTATTGCCATTGCTTCACTGTTGGCTTTGACCAGGGTATGATCTCTTAATCTTCTCTCTGAGCTG |
