# Supplementary material for: Reference miRNAs for miRNAome Analysis of Urothelial Carcinomas
Source: PubMed Central journal article supplement (PMC3380005; doi:10.1371/journal.pone.0039309), 2012-06-20
Supplement: pone.0039309.s003.pdf [file pone.0039309.s003.pdf]

**Table S3 List of the 101 miRNAs from the microarray for the identification of candidate reference miRNAs.**

All miRNAs of the microarray are listed that were flagged as "present" in all examined 24 tissue samples by the Genespring GX11 software.

|    | miRNA         | Active sequence on the microarray |
|----|---------------|-----------------------------------|
| 1  | hsa-let-7a    | AACTATACAACCTACTACCT              |
| 2  | hsa-let-7b    | AACCACACAACCTACTACC               |
| 3  | hsa-let-7c    | AACCATACAACCTACTACC               |
| 4  | hsa-let-7d    | AACTATGCAACCTACTACC               |
| 5  | hsa-let-7e    | AACTATACAACCTCCTACC               |
| 6  | hsa-let-7f    | AACTATACAATCTACTACCTC             |
| 7  | hsa-let-7g    | AACTGTACAAACTACTACCTC             |
| 8  | hsa-let-7i    | AACAGCACAAACTACTACCTC             |
| 9  | hsa-miR-10b   | CACAAATTCGGTTCTACAGGG             |
| 10 | hsa-miR-15a   | CACAAACCATTATGTGCTGCT             |
| 11 | hsa-miR-15b   | TGTAAACCATGATGTGCTGC              |
| 12 | hsa-miR-16    | CGCCAATATTTACGTGCTG               |
| 13 | hsa-miR-17    | CTACCTGCACTGTAAGC                 |
| 14 | hsa-miR-19a   | TCAGTTTTGCATAGATTTGCA             |
| 15 | hsa-miR-19b   | TCAGTTTTGCATGGATTTGC              |
| 16 | hsa-miR-20a   | CTACCTGCACTATAAGCAC               |
| 17 | hsa-miR-20b   | CTACCTGCACTATGAGCAC               |
| 18 | hsa-miR-21    | TCAACATCAGTCTGATAAGC              |
| 19 | hsa-miR-22    | ACAGTTCTTCAACTGGCAG               |
| 20 | hsa-miR-23a   | GGAAATCCCTGGCAATGT                |
| 21 | hsa-miR-23b   | GGTAATCCCTGGCAATG                 |
| 22 | hsa-miR-24    | CTGTTCTGCTGAACTGA                 |
| 23 | hsa-miR-25    | TCAGACCGAGACAAGTGC                |
| 24 | hsa-miR-26a   | AGCCTATCCTGGATT                   |
| 25 | hsa-miR-26b   | ACCTATCCTGAATTACTTGA              |
| 26 | hsa-miR-27a   | GCGGAACTTAGCCACTG                 |
| 27 | hsa-miR-27b   | GCAGAACTTAGCCACTGT                |
| 28 | hsa-miR-28-5p | CTCAATAGACTGTGAGCTCC              |
| 29 | hsa-miR-29a   | TAACCGATTTTCAGATGGTGC             |
| 30 | hsa-miR-29b   | AACACTGATTTCAAATGGTGC             |
| 31 | hsa-miR-29c   | TAACCGATTTCAAATGGTGCTA            |
| 32 | hsa-miR-29c*  | GAACACCAGGAGAAATCGGT              |
| 33 | hsa-miR-30a   | CTTCCAGTCGAGGATG                  |
| 34 | hsa-miR-30b   | AGCTGAGTGTAGGATGTT                |
| 35 | hsa-miR-30c   | GCTGAGAGTGTAGGATGT                |
| 36 | hsa-miR-30d   | CTTCCAGTCGGGGA                    |
| 37 | hsa-miR-30e   | CTTCCAGTCAAGGATGT                 |
| 38 | hsa-miR-34a   | ACAACCAGCTAAGACACTGC              |
| 39 | hsa-miR-92a   | ACAGGCCGGGACAAGT                  |
| 40 | hsa-miR-93    | CTACCTGCACGAACAG                  |
| 41 | hsa-miR-99b   | CGCAAGGTCGGTTCTA                  |
| 42 | hsa-miR-101   | TTCAGTTATCACAGTACTGT              |
| 43 | hsa-miR-103   | TCATAGCCCTGTACAATG                |
| 44 | hsa-miR-106b  | ATCTGCACTGTCAGCAC                 |

|    | <b>miRNA</b>    | <b>Active sequence on the microarray</b> |
|----|-----------------|------------------------------------------|
| 45 | hsa-miR-107     | TGATAGCCCTGTACAATGCT                     |
| 46 | hsa-miR-125a-3p | GGCTCCCAAGAACCTCA                        |
| 47 | hsa-miR-125a-5p | TCACAGGTTAAAGGGTCTC                      |
| 48 | hsa-miR-125b    | TCACAAGTTAGGGTCTC                        |
| 49 | hsa-miR-126     | CGCATTATTACTCACGGT                       |
| 50 | hsa-miR-130a    | ATGCCCTTTTAAACATTGCA                     |
| 51 | hsa-miR-130b    | ATGCCCTTTCATCATTGC                       |
| 52 | hsa-miR-140-3p  | CCGTGGTTCTACCCCT                         |
| 53 | hsa-miR-140-5p  | CTACCATAGGGTAAAACCACT                    |
| 54 | hsa-miR-141     | CCATCTTTACCAGACAG                        |
| 55 | hsa-miR-142-3p  | TCCATAAAGTAGGAAACACTACA                  |
| 56 | hsa-miR-143     | GAGCTACAGTGCTTC                          |
| 57 | hsa-miR-145     | AGGGATTCTGGGAAAAC                        |
| 58 | hsa-miR-148a    | ACAAAGTTCTGTAGTGCCT                      |
| 59 | hsa-miR-148b    | ACAAAGTTCTGTGATGCAC                      |
| 60 | hsa-miR-151-3p  | CCTCAAGGAGCTTCAGT                        |
| 61 | hsa-miR-151-5p  | ACTAGACTGTGAGCTCC                        |
| 62 | hsa-miR-181a    | ACTCACCGACAGCGT                          |
| 63 | hsa-miR-181b    | ACCCACCGACAGCA                           |
| 64 | hsa-miR-185     | TCAGGAAGTGCCTTTCT                        |
| 65 | hsa-miR-193b    | AGCGGGACTTTGAGGG                         |
| 66 | hsa-miR-195     | GCCAATATTTCTGTGCTGC                      |
| 67 | hsa-miR-199a-3p | TAACCAATGTGCAGACTACT                     |
| 68 | hsa-miR-199a-5p | GAACAGGTAGTCTGAACAC                      |
| 69 | hsa-miR-200a    | ACATCGTTACCAGACAGT                       |
| 70 | hsa-miR-200b    | TCATCATTACCAGGCAG                        |
| 71 | hsa-miR-200c    | TCCATCATTACCCGG                          |
| 72 | hsa-miR-205     | CAGACTCCGGTGGAAT                         |
| 73 | hsa-miR-210     | TCAGCCGCTGTCACAC                         |
| 74 | hsa-miR-223     | TGGGGTATTTGACAAACTGAC                    |
| 75 | hsa-miR-320a    | TCGCCCTCTCAAC                            |
| 76 | hsa-miR-324-3p  | CCAGCAGCACCTGGGG                         |
| 77 | hsa-miR-331-3p  | TTCTAGGATAGGCCAGGG                       |
| 78 | hsa-miR-342-3p  | ACGGGTGCGATTTCTG                         |
| 79 | hsa-miR-361-5p  | GTACCCCTGGAGATTC                         |
| 80 | hsa-miR-365     | ATAAGGATTTTATAGGGGCATTA                  |
| 81 | hsa-miR-374a    | CACTTATCAGGTTGTATTATAA                   |
| 82 | hsa-miR-378     | CCTTCTGACTCCA                            |
| 83 | hsa-miR-423-5p  | AAAGTCTCGCTCTCTG                         |
| 84 | hsa-miR-424     | TTCAAAACATGAATTGCTGCTG                   |
| 85 | hsa-miR-425     | TCAACGGGAGTGATCGTG                       |
| 86 | hsa-miR-429     | ACGGTTTTACCAGACAGTA                      |
| 87 | hsa-miR-451     | AACTCAGTAATGGTAACGGTTT                   |
| 88 | hsa-miR-483-5p  | CTCCCTTCTTTCCCTC                         |
| 89 | hsa-miR-494     | GAGGTTTCCCGTGTA                          |
| 90 | hsa-miR-497     | ACAAACCACAGTGTGCTG                       |
| 91 | hsa-miR-513a-5p | ATGACACCTCCCTGTG                         |
| 92 | hsa-miR-575     | GCTCCTGTCCAACCTGGCT                      |

|     | <b>miRNA</b>         | <b>Active sequence on the microarray</b> |
|-----|----------------------|------------------------------------------|
| 93  | hsa-miR-638          | AGGCCGCCACCCGC                           |
| 94  | hsa-miR-768-3p_v11.0 | GTCAGCAGTTTGAGTGTGTCAG                   |
| 95  | hsa-miR-768-5p_v11.0 | ATCACTCCGTACTTTCATC                      |
| 96  | hsa-miR-801_v10.1    | GTCGATTCCGCACGC                          |
| 97  | hsa-miR-874          | TCGGTCCCTCGGG                            |
| 98  | hsa-miR-886-3p       | AAGGGTCAGTAAGCACCCGC                     |
| 99  | hsa-miR-923_v12.0    | AGTTTCTTTTCCTCCGC                        |
| 100 | hsa-miR-939          | CACCCCCAGAGCC                            |
| 101 | hsa-miR-1225-5p      | CCCCCACTGGG                              |
