# Supplementary material for: Reference miRNAs for miRNAome Analysis of Urothelial Carcinomas
Source: PubMed Central journal article supplement (PMC3380005; doi:10.1371/journal.pone.0039309), 2012-06-20
Supplement: pone.0039309.s004.pdf [file pone.0039309.s004.pdf]

**Table S4 Spearman rank correlation coefficients ( $r_s$ ) between the candidate reference genes.&**

| miR         |            | miR-29 | miR-101      | miR-125a-5p  | miR-148b     | miR-151-3p   | miR-151-5p   | miR-181a     | miR-181b     | miR-324-3p   | miR-424 | miR-874 | RNU6B  | RNU48  | Z30    |
|-------------|------------|--------|--------------|--------------|--------------|--------------|--------------|--------------|--------------|--------------|---------|---------|--------|--------|--------|
| miR-29c     | $r_s$      |        | 0.575        | 0.470        | 0.393        | 0.272        | 0.500        | 0.201        | -0.163       | 0.386        | 0.264   | 0.583   | 0.143  | 0.557  | 0.174  |
|             | $p$ -value |        | 0.0001       | 0.0001       | 0.002        | 0.039        | 0.0001       | 0.131        | 0.221        | 0.003        | 0.045   | 0.0001  | 0.283  | 0.0001 | 0.192  |
| miR-101     | $r_s$      | 0.575  |              | <b>0.621</b> | 0.551        | 0.144        | <b>0.622</b> | 0.105        | 0.028        | <b>0.630</b> | 0.249   | 0.489   | -0.074 | 0.196  | 0.257  |
|             | $p$ -value | 0.0001 |              | 0.0001       | 0.0001       | 0.280        | 0.0001       | 0.434        | 0.834        | 0.0001       | 0.059   | 0.0001  | 0.581  | 0.141  | 0.051  |
| miR-125a-5p | $r_s$      | 0.470  | <b>0.621</b> |              | 0.380        | 0.266        | <b>0.787</b> | 0.314        | 0.150        | <b>0.709</b> | 0.306   | 0.341   | -0.150 | 0.078  | 0.186  |
|             | $p$ -value | 0.0001 | 0.0001       |              | 0.003        | 0.044        | 0.0001       | 0.016        | 0.263        | 0.0001       | 0.020   | 0.009   | 0.261  | 0.560  | 0.161  |
| miR-148b    | $r_s$      | 0.393  | 0.551        | 0.380        |              | <b>0.649</b> | 0.530        | 0.357        | 0.220        | 0.440        | 0.315   | 0.368   | 0.137  | 0.381  | 0.524  |
|             | $p$ -value | 0.002  | 0.0001       | 0.003        |              | 0.0001       | 0.0001       | 0.006        | 0.096        | 0.001        | 0.016   | 0.004   | 0.306  | 0.003  | 0.0001 |
| miR-151-3p  | $r_s$      | 0.272  | 0.144        | 0.266        | <b>0.649</b> |              | 0.503        | 0.304        | 0.245        | 0.135        | 0.149   | 0.374   | 0.216  | 0.433  | 0.489  |
|             | $p$ -value | 0.039  | 0.280        | 0.044        | 0.0001       |              | 0.0001       | 0.021        | 0.064        | 0.313        | 0.266   | 0.004   | 0.104  | 0.001  | 0.0001 |
| miR-151-5p  | $r_s$      | 0.500  | <b>0.622</b> | <b>0.787</b> | 0.530        | 0.503        |              | 0.229        | 0.089        | <b>0.672</b> | 0.173   | 0.349   | -0.115 | 0.239  | 0.298  |
|             | $p$ -value | 0.0001 | 0.0001       | 0.0001       | 0.0001       | 0.0001       |              | 0.084        | 0.505        | 0.0001       | 0.194   | 0.007   | 0.390  | 0.071  | 0.023  |
| miR-181a    | $r_s$      | 0.201  | 0.105        | 0.314        | 0.357        | 0.304        | 0.229        |              | <b>0.746</b> | 0.200        | 0.586   | 0.147   | 0.048  | 0.355  | 0.289  |
|             | $p$ -value | 0.131  | 0.434        | 0.016        | 0.006        | 0.021        | 0.084        |              | 0.0001       | 0.132        | 0.0001  | 0.272   | 0.722  | 0.006  | 0.028  |
| miR-181b    | $r_s$      | -0.163 | 0.028        | 0.150        | 0.220        | 0.245        | 0.089        | <b>0.746</b> |              | 0.091        | 0.350   | -0.046  | 0.053  | 0.052  | 0.231  |
|             | $p$ -value | 0.221  | 0.834        | 0.263        | 0.096        | 0.064        | 0.505        | 0.0001       |              | 0.498        | 0.007   | 0.733   | 0.694  | 0.698  | 0.081  |
| miR-324-3p  | $r_s$      | 0.386  | <b>0.630</b> | <b>0.709</b> | 0.440        | 0.135        | <b>0.672</b> | 0.200        | 0.091        |              | 0.214   | 0.224   | -0.275 | -0.045 | 0.092  |
|             | $p$ -value | 0.003  | 0.0001       | 0.0001       | 0.001        | 0.313        | 0.0001       | 0.132        | 0.498        |              | 0.107   | 0.090   | 0.037  | 0.736  | 0.491  |
| miR-424     | $r_s$      | 0.264  | 0.249        | 0.306        | 0.315        | 0.149        | 0.173        | 0.586        | 0.350        | 0.214        |         | 0.151   | 0.184  | 0.352  | 0.256  |
|             | $p$ -value | 0.045  | 0.059        | 0.020        | 0.016        | 0.266        | 0.194        | 0.0001       | 0.007        | 0.107        |         | 0.257   | 0.166  | 0.007  | 0.052  |
| miR-874     | $r_s$      | 0.583  | 0.489        | 0.341        | 0.368        | 0.374        | 0.349        | 0.147        | -0.046       | 0.224        | 0.151   |         | 0.200  | 0.504  | 0.012  |
|             | $p$ -value | 0.0001 | 0.0001       | 0.009        | 0.004        | 0.004        | 0.007        | 0.272        | 0.733        | 0.090        | 0.257   |         | 0.132  | 0.0001 | 0.930  |
| RNU6B       | $r_s$      | 0.143  | -0.074       | -0.150       | 0.137        | 0.216        | -0.115       | 0.048        | 0.053        | -0.275       | 0.184   | 0.200   |        | 0.436  | 0.197  |
|             | $p$ -value | 0.283  | 0.581        | 0.261        | 0.306        | 0.104        | 0.390        | 0.722        | 0.694        | 0.037        | 0.166   | 0.132   |        | 0.001  | 0.139  |
| RNU48       | $r_s$      | 0.557  | 0.196        | 0.078        | 0.381        | 0.433        | 0.239        | 0.355        | 0.052        | -0.045       | 0.352   | 0.504   | 0.436  |        | 0.353  |

|            |                 |        |       |       |        |        |       |       |       |       |       |        |       |       |
|------------|-----------------|--------|-------|-------|--------|--------|-------|-------|-------|-------|-------|--------|-------|-------|
|            | <i>p</i> -value | 0.0001 | 0.141 | 0.560 | 0.003  | 0.001  | 0.071 | 0.006 | 0.698 | 0.736 | 0.007 | 0.0001 | 0.001 | 0.007 |
| <b>Z30</b> | $r_s$           | 0.174  | 0.257 | 0.186 | 0.524  | 0.489  | 0.298 | 0.289 | 0.231 | 0.092 | 0.256 | 0.012  | 0.197 | 0.353 |
|            | <i>p</i> -value | 0.192  | 0.051 | 0.161 | 0.0001 | 0.0001 | 0.023 | 0.028 | 0.081 | 0.491 | 0.052 | 0.930  | 0.139 | 0.007 |

&Correlations marked in yellow indicate  $r_s$  values  $\geq 0.6$ .
